# Supplementary material for: Triazatriangulenium-based porous organic polymers for carbon dioxide capture
Source: Royal Society of Chemistry journal article supplement (doi:10.1039/c5ra18047c), 2015-01-01
Supplement: c5ra18047c1.pdf [file c5ra18047c1.pdf]

Electronic Supplementary Information

**Triazatriangulenium-based porous organic  
polymers for carbon dioxide capture**

Xin-Ming Hu,<sup>a,b</sup> Qi Chen,<sup>a</sup> Zhu-Yin Sui,<sup>a</sup> Zhi-Qiang Zhao,<sup>a</sup> Nicolas  
Bovet,<sup>b</sup> Bo W. Laursen,<sup>\*b</sup> Bao-Hang Han<sup>\*a</sup>

<sup>a</sup> *CAS Key Laboratory of Nanosystem and Hierarchical Fabrication,  
National Center for Nanoscience and Technology, Beijing 100190, China*

*Email: [hanbh@nanoctr.cn](mailto:hanbh@nanoctr.cn)*

<sup>b</sup> *Nano-Science Center and Department of Chemistry, University of  
Copenhagen, Universitetsparken 5, DK-2100 København Ø, Denmark*

*E-mail: [bwl@nano.ku.dk](mailto:bwl@nano.ku.dk)*

**Table S1.** Chemical composition (wt%) of TAPOPs determined by XPS analysis.

| Polymer             | C     | N    | O    | S     | B    | F    | Cl   |
|---------------------|-------|------|------|-------|------|------|------|
| TATA-1 <sup>a</sup> | 69.75 | 4.98 | 0    | 11.40 | 1.28 | 9.01 | 0    |
| TAPOP-1             | 71.83 | 4.76 | 2.32 | 12.71 | 1.21 | 6.18 | 0.99 |
| TATA-2 <sup>a</sup> | 80.22 | 7.69 | 0    | 0     | 0.99 | 6.95 | 0    |
| TAPOP-2             | 81.22 | 8.09 | 0.93 | 0     | 0.96 | 7.54 | 1.26 |

<sup>a</sup> Theoretical value for TATA monomers.

**Table S2.** Textural property and CO<sub>2</sub> uptake of carbazole-based POPs with similar structure.

| POPs    | Monomer Structures                                                                  | $S_{\text{BET}}$<br>(m <sup>2</sup> g <sup>-1</sup> ) | CO <sub>2</sub><br>Uptake<br>(wt %) <sup>a</sup> | $Q_{\text{st}}$<br>(kJ mol <sup>-1</sup> ) | Ref.      |
|---------|-------------------------------------------------------------------------------------|-------------------------------------------------------|--------------------------------------------------|--------------------------------------------|-----------|
| TAPOP-2 | 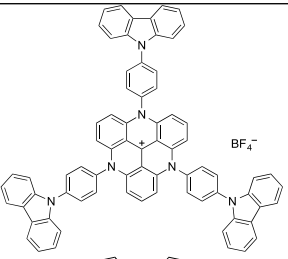   | 930                                                   | 13.6                                             | 34.7                                       | This work |
| CPOP-1  |    | 2220                                                  | 21.2                                             | 27                                         | S1        |
| CPOP-5  |   | 1050                                                  | 11.8                                             | 31.5                                       | S2        |
| CPOP-6  |  | 980                                                   | 11.5                                             | 30                                         | S2        |
| MFCMP-1 |  | 840                                                   | 16.2                                             | 30                                         | S3        |

<sup>a</sup> at 273 K and 1.0 bar.

### References:

- S1 Q. Chen, M. Luo, P. Hammershøj, D. Zhou, Y. Han, B. W. Laursen, C.-G. Yan and B.-H. Han, Microporous polycarbazole with high specific surface area for gas storage and separation. *J. Am. Chem. Soc.*, 2012, **134** (14), 6084–6087.



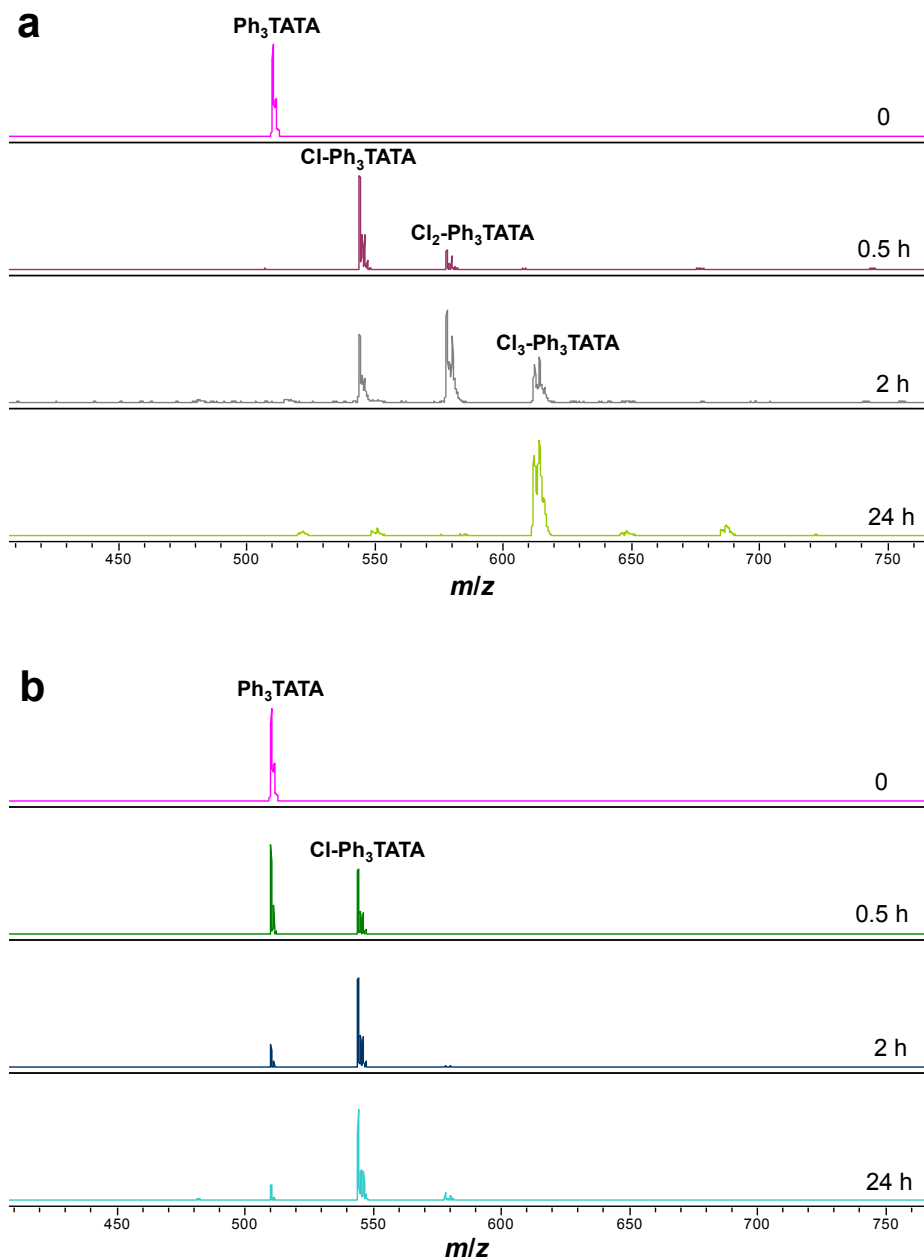

**Figure S1.** Mass spectra of the reaction mixtures of  $\text{Ph}_3\text{TATA}$  in  $\text{FeCl}_3\text{-CHCl}_3$  (a) and  $\text{FeCl}_3\text{-CH}_2\text{Cl}_2\text{-CF}_3\text{COOH}$  (b) system after a certain time interval.

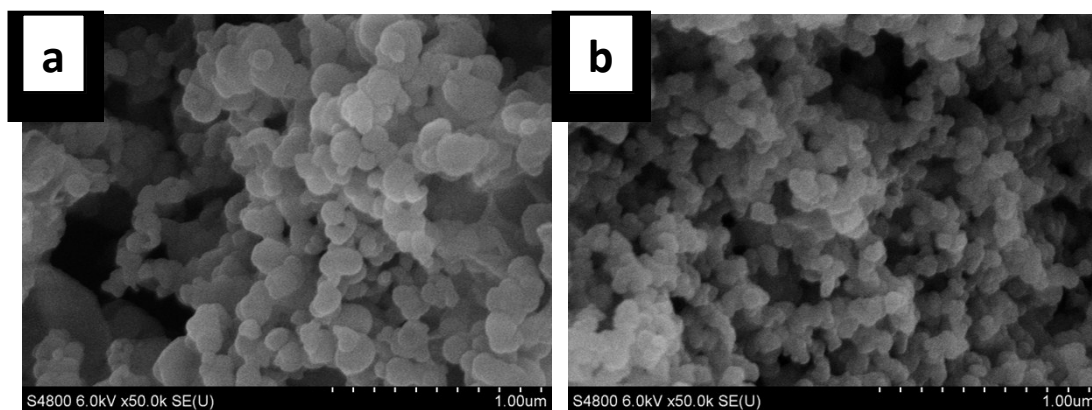

**Figure S2.** SEM images of (a) TAPOP-1 and (b) TAPOP-2.

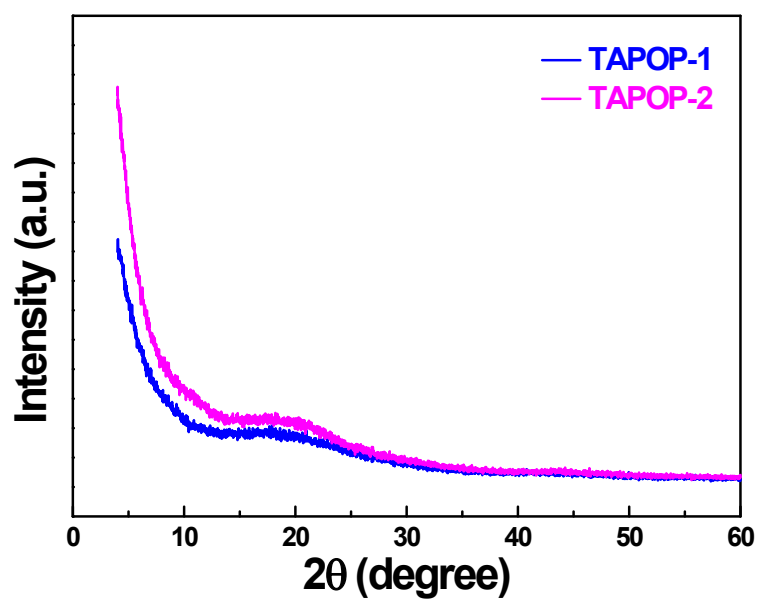

**Figure S3.** XRD patterns of TAPOPs.

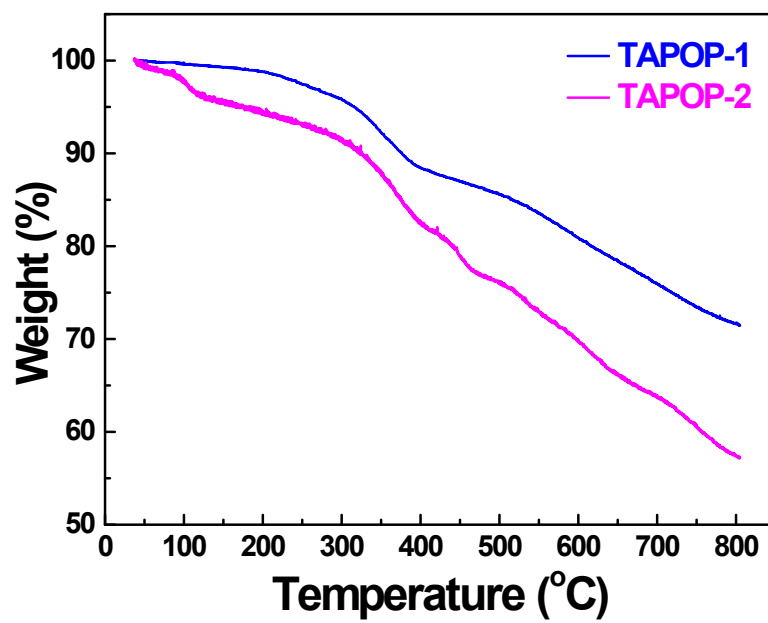

**Figure S4.** TGA curves of TAPOPs.

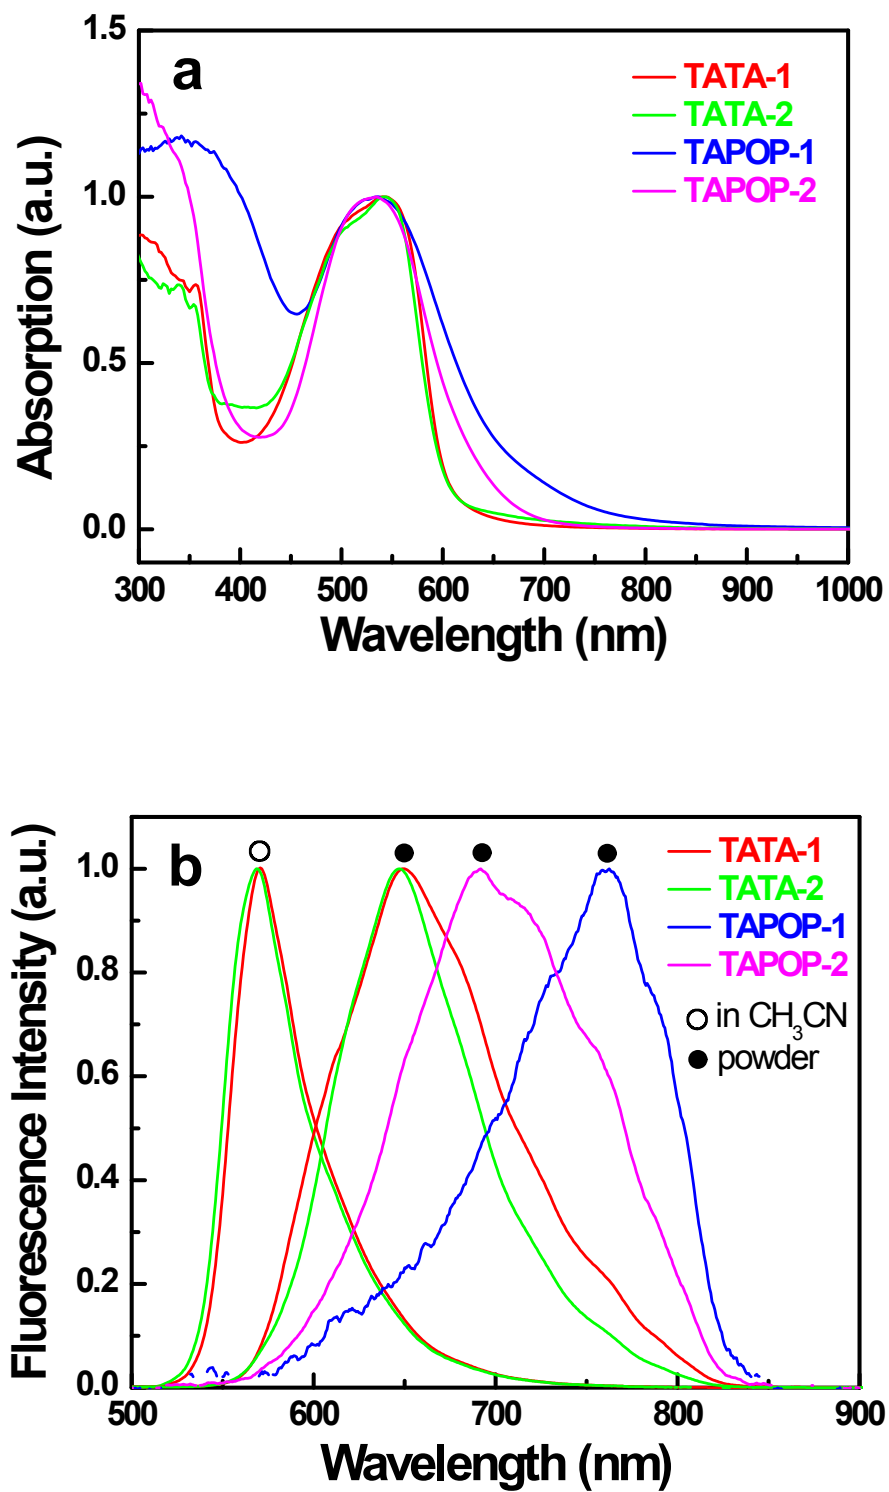

Figure S5. Normalized absorption (a) and emission (b) spectra of TATA monomers and TAPOPs.



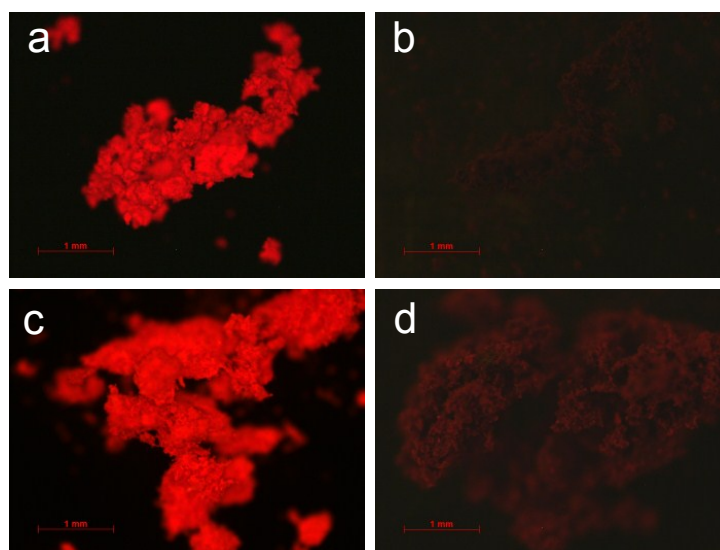

**Figure S6.** Emission images of the TATA monomers and TAPOPs. (a) TATA-1, (b) TAPOP-1, (c) TATA-2, (d) TAPOP-2.

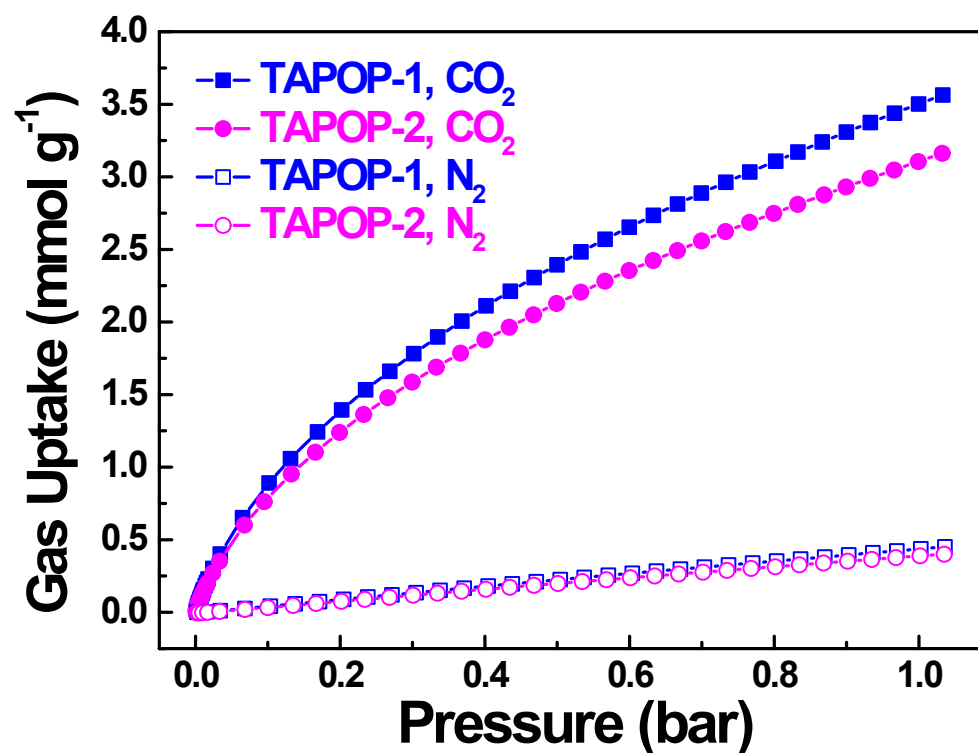

**Figure S7.** CO<sub>2</sub> and N<sub>2</sub> adsorption isotherms of TAPOPs at 273 K.

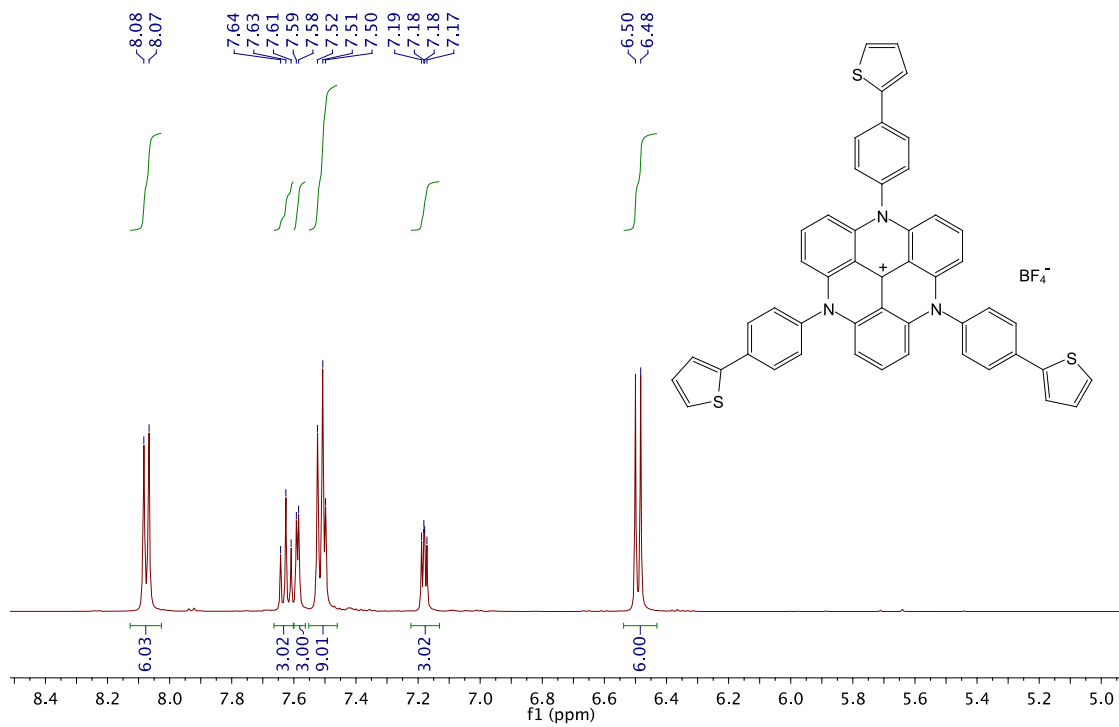

<sup>1</sup>H NMR spectrum of TATA-1

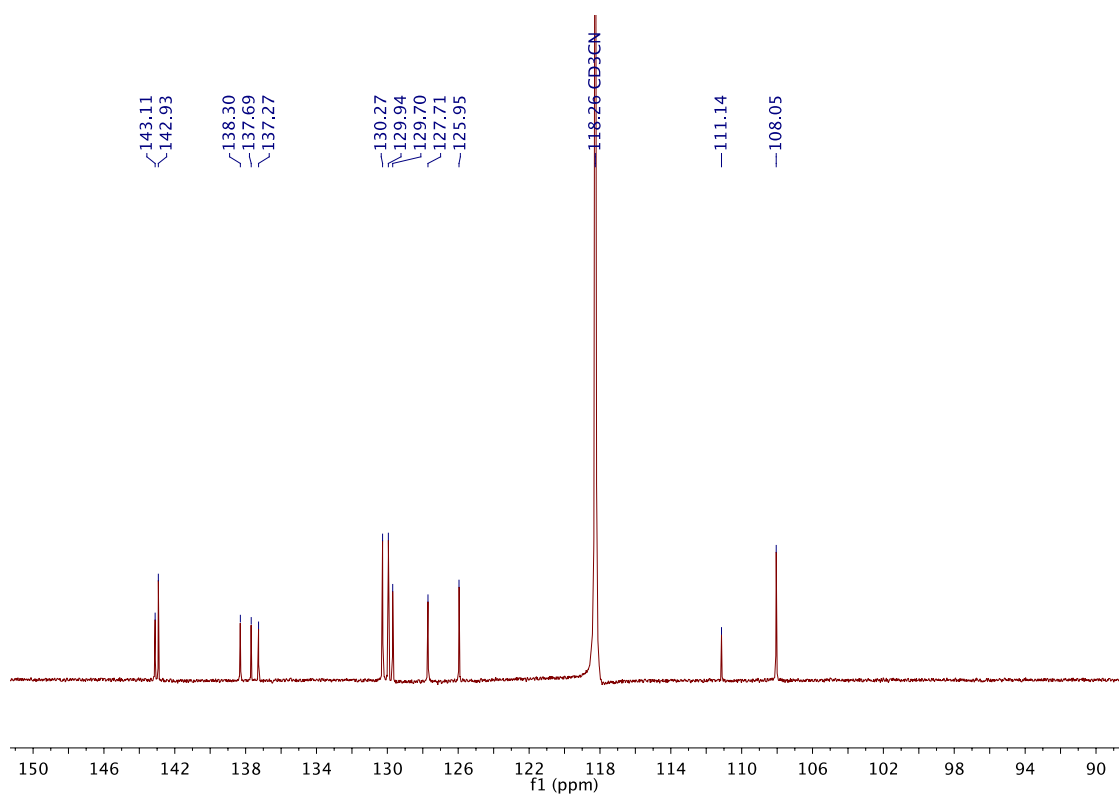

<sup>13</sup>C NMR spectrum of TATA-1

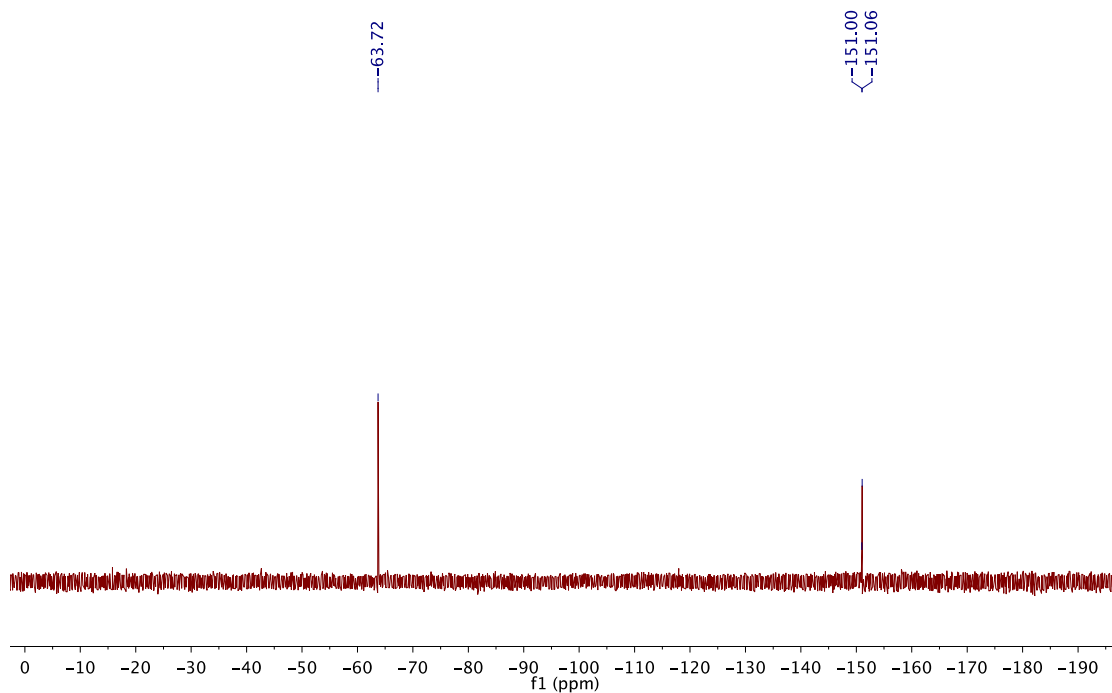

$^{19}\text{F}$  NMR spectrum of TATA-1

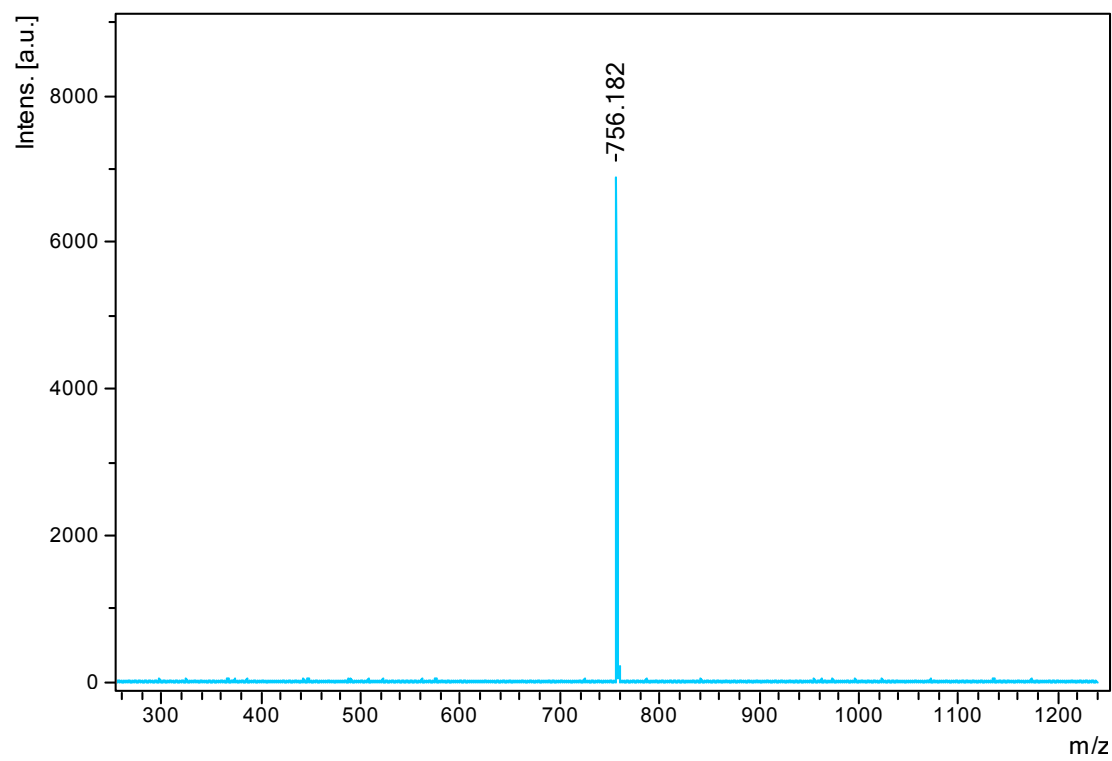

Mass spectrum of TATA-1

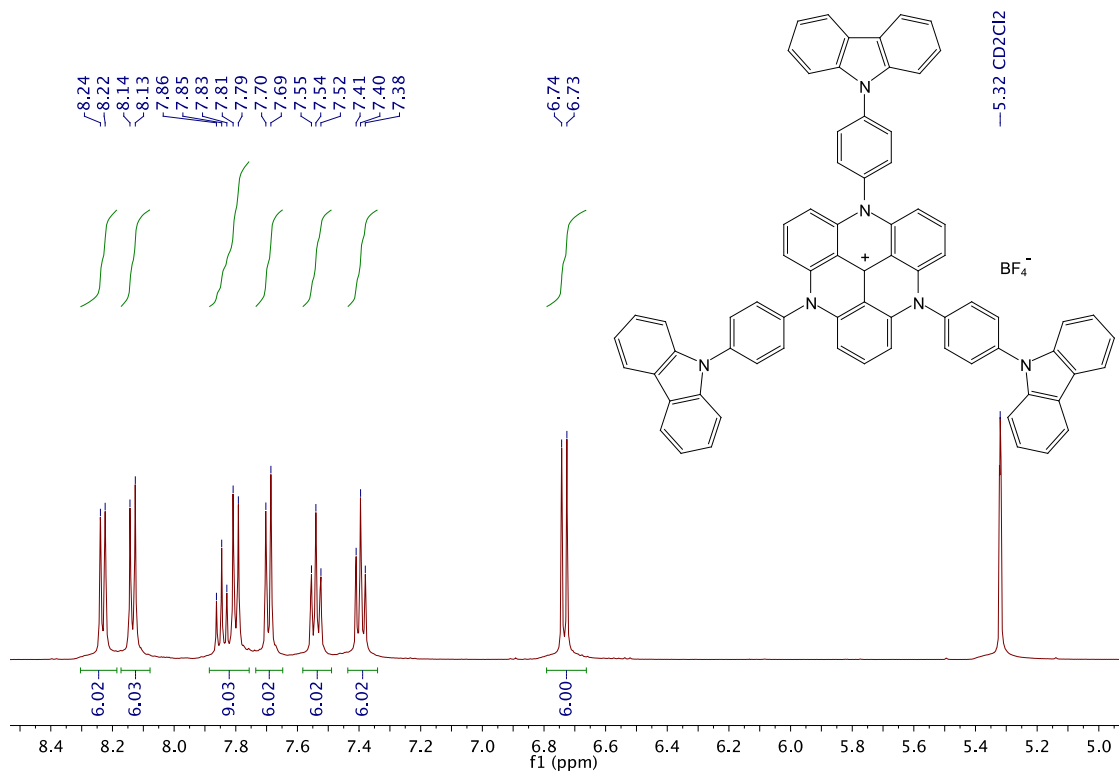

$^1\text{H NMR}$  spectrum of TATA-2

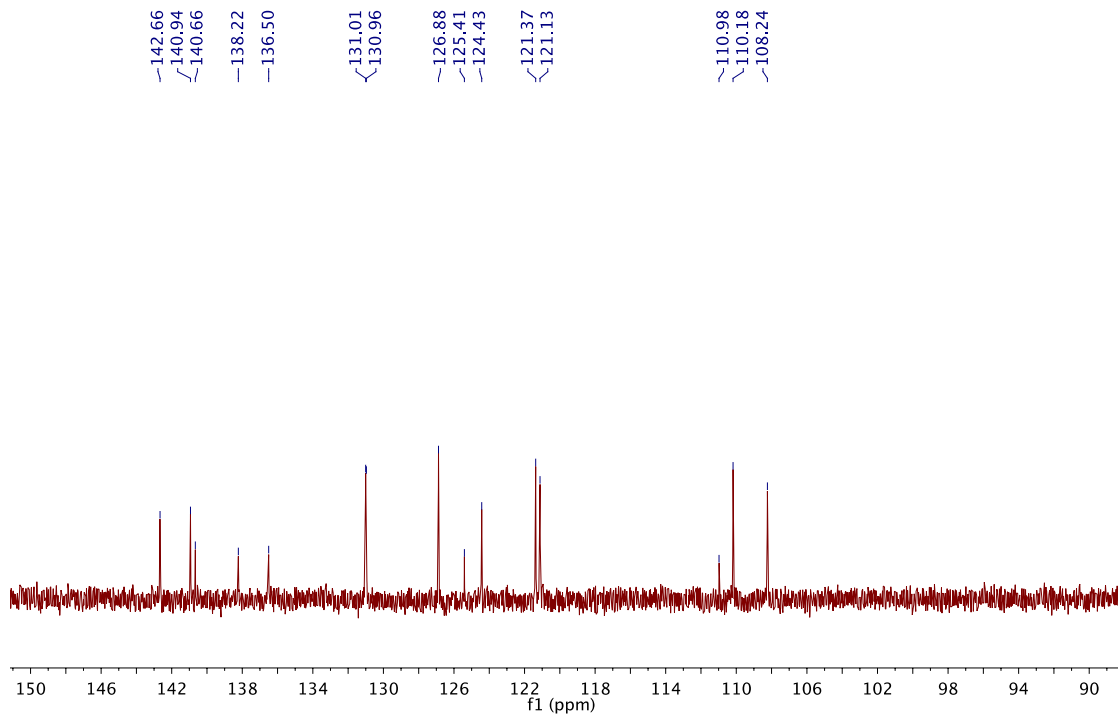

$^{13}\text{C NMR}$  spectrum of TATA-2

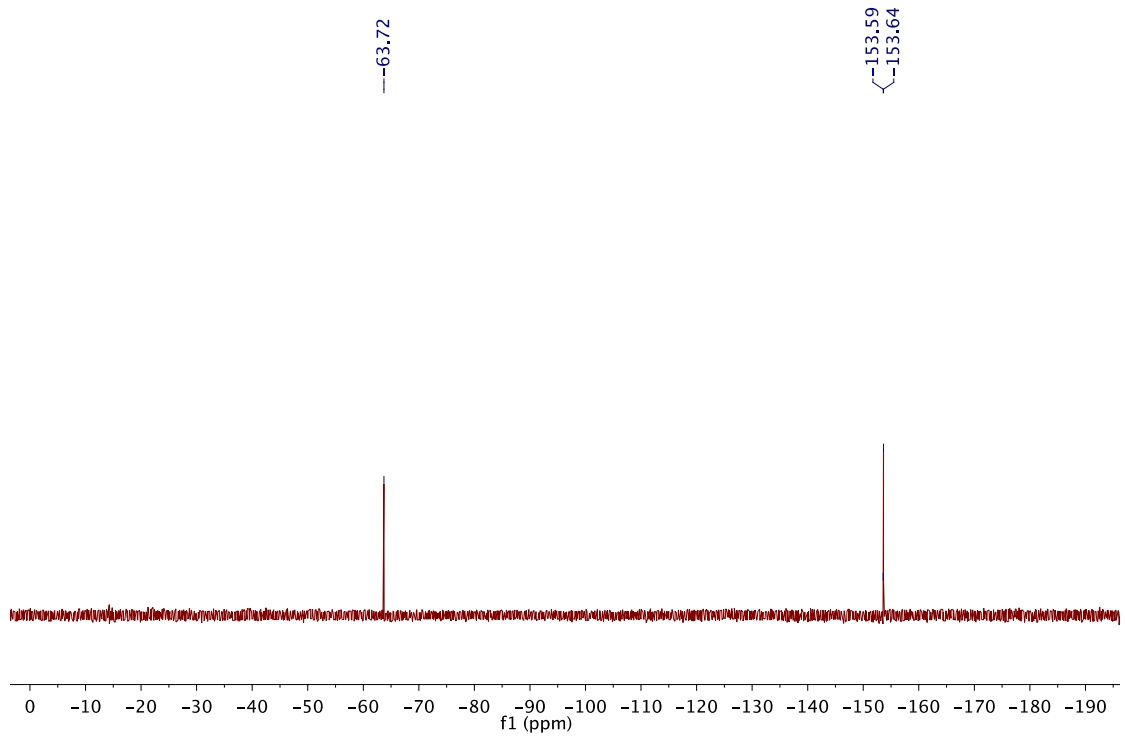

$^{19}\text{F}$  NMR spectrum of TATA-2

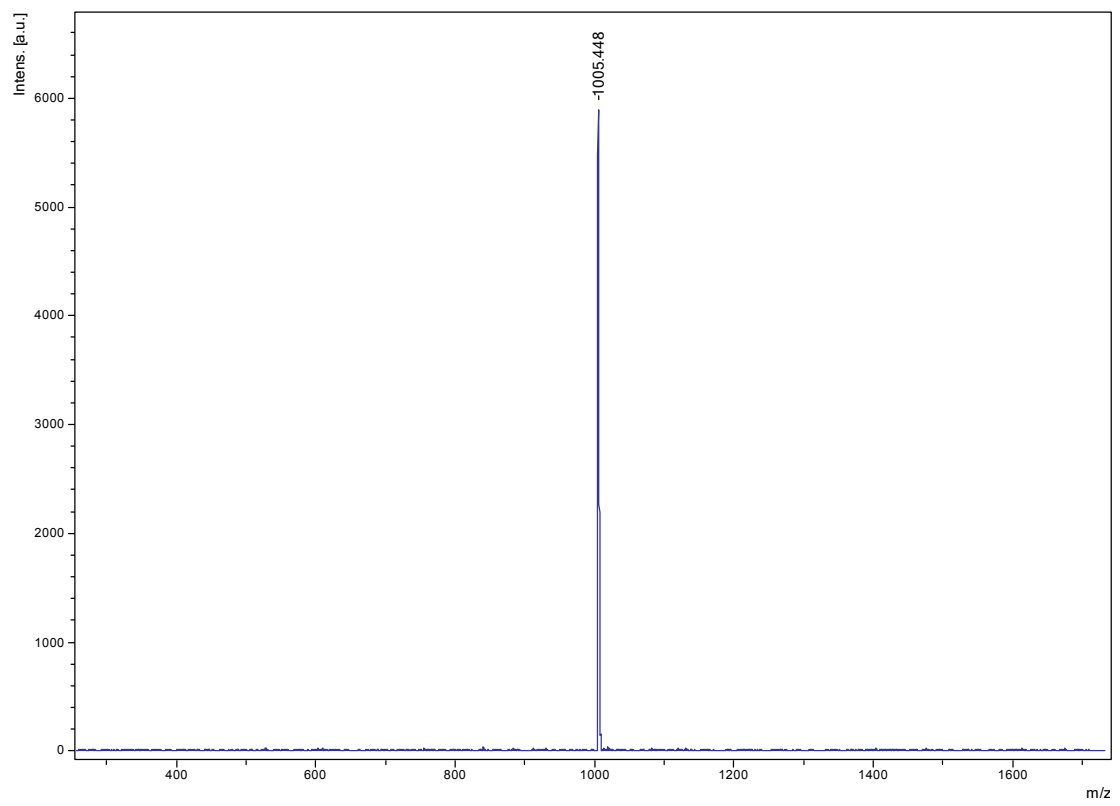

Mass spectra of TATA-2

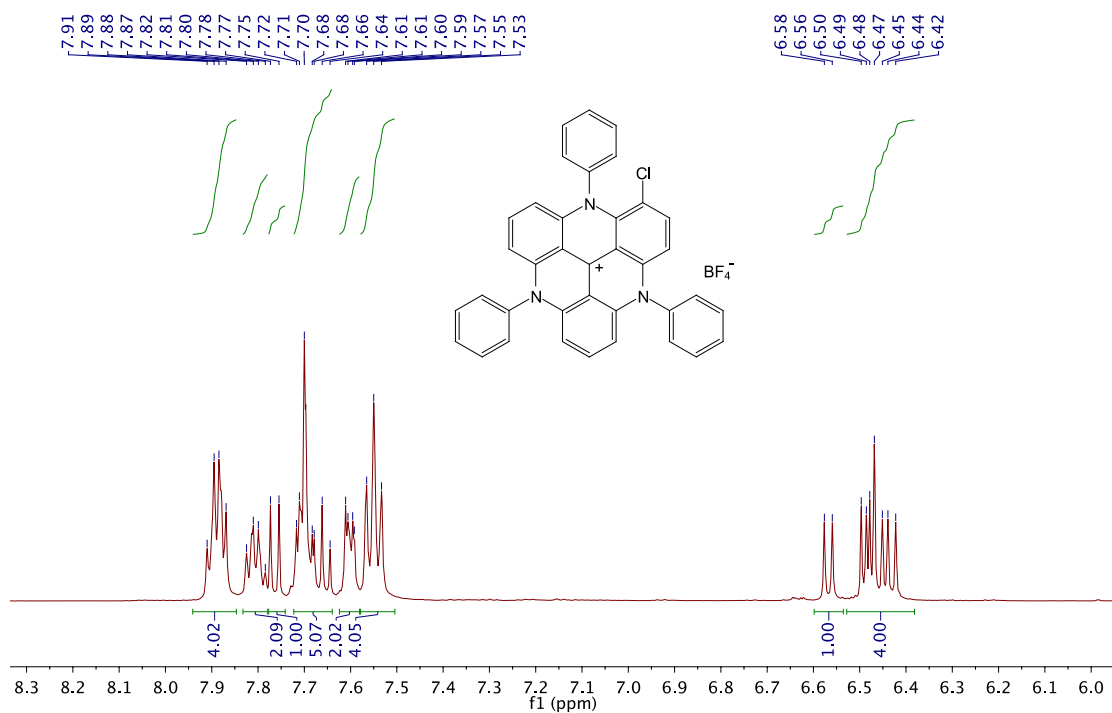

<sup>1</sup>H NMR spectrum of Cl-Ph<sub>3</sub>TATA

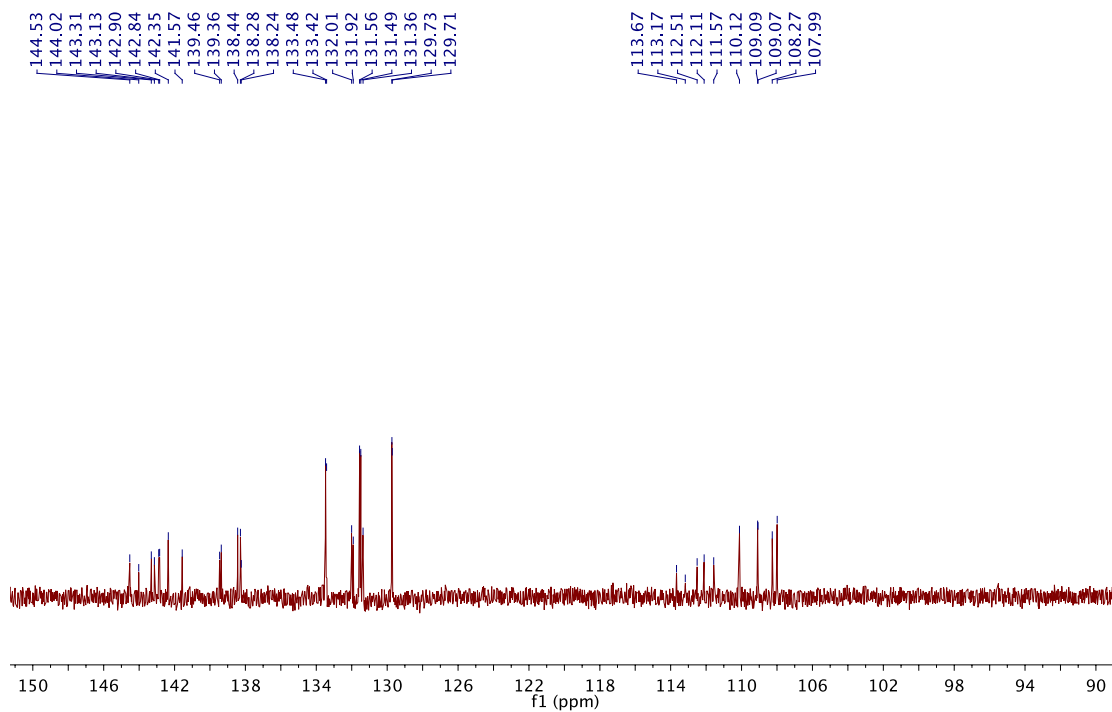

<sup>13</sup>C NMR spectrum of Cl-Ph<sub>3</sub>TATA

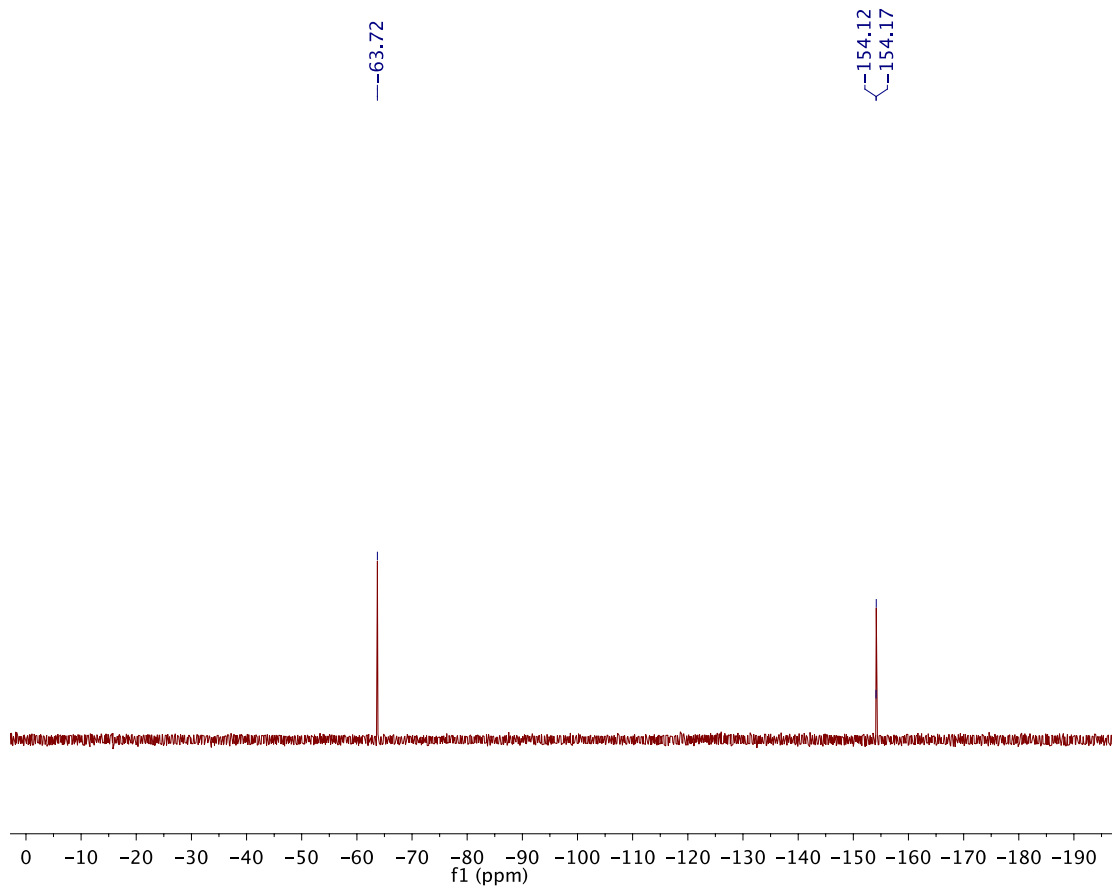

$^{19}\text{F}$  NMR spectrum of Cl- $\text{Ph}_3\text{TATA}$

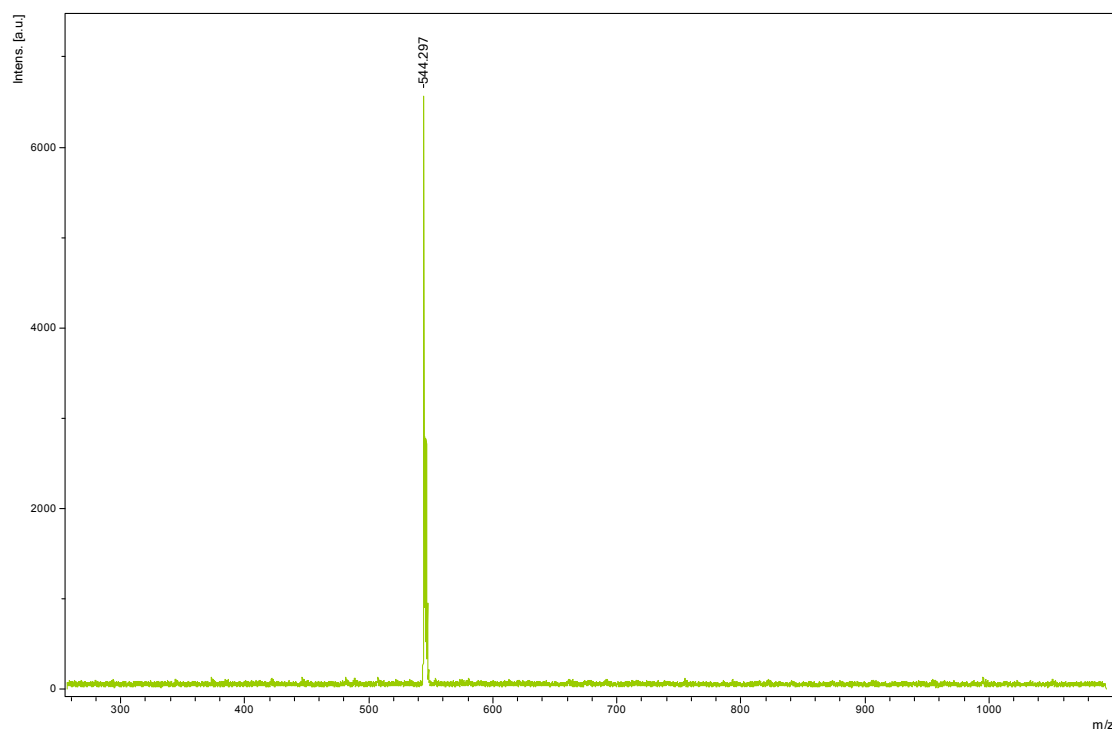

Mass spectrum of Cl- $\text{Ph}_3\text{TATA}$

- S2 Q. Chen, D.-P. Liu, M. Luo, L.-J. Feng, Y.-C. Zhao and B.-H. Han, Nitrogen-containing microporous conjugated polymers via carbazole-based oxidative coupling polymerization: Preparation, porosity, and gas uptake. *Small*, 2014, **10** (2), 308–315.
- S3 Y. Zhang, A. Sigen, Y. Zou, X. Luo, Z. Li, H. Xia, X. Liu and Y. Mu, Gas uptake, molecular sensing and organocatalytic performances of a multifunctional carbazole-based conjugated microporous polymer. *J. Mater. Chem. A*, 2014, **2** (33), 13422–13430.
